# Supplementary material for: Turning the structure of the Aβ42peptide by different functionalized carbon nanotubes: a molecular dynamics simulation study
Source: Royal Society of Chemistry journal article supplement (doi:10.1039/d1cp04278e), 2022-01-01
Supplement: d1cp04278e1.pdf [file d1cp04278e1.pdf]

## *Supporting Information*

### **Turning the structure of A $\beta$ <sub>42</sub> peptide by different functionalized carbon nanotubes: a molecular dynamics simulations study**

Jiawen Wang,<sup>a</sup> Huilong Dong,<sup>c</sup> Tianle, Leng<sup>d</sup>, Yi Yu,<sup>\*a</sup> and Youyong Li<sup>\*a,b</sup>

- a. Institute of Functional Nano & Soft Materials (FUNSOM), Soochow University, Suzhou, Jiangsu 215123, China
- b. Macao Institute of Materials Science and Engineering, Macau University of Science and Technology, Taipa 999078, Macau SAR, China
- c. School of Materials Engineering, Changshu Institute of Technology, Changshu, Jiangsu 215500, China
- d. Dougherty Valley High School, 10550 Albion Rd, San Ramon, CA 94582, USA

\* Corresponding authors.

E-mail: yyli@suda.edu.cn (Y. Li); 316061038@qq.com (Y. Yu).

## 1. Initial configuration of A $\beta$ <sub>42</sub> peptide with different CNTs.

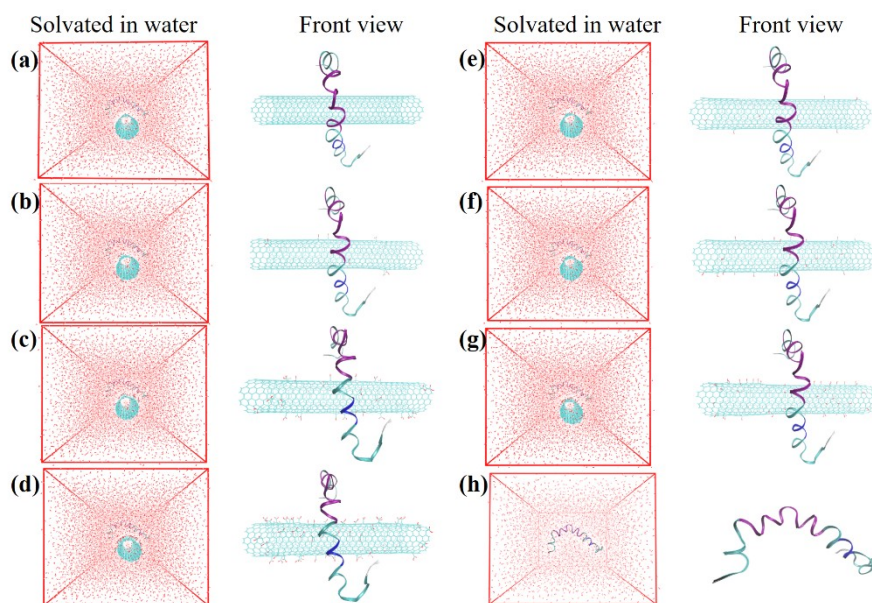

**Fig. S1** Initial configuration of A $\beta$ <sub>42</sub> peptide with CNTs: (a) CNT, (b) CNT(COOH)<sub>12</sub>, (c) CNT(COOH)<sub>36</sub>, (d) CNT(COOH)<sub>72</sub>, (e) CNT(OH)<sub>12</sub>, (f) CNT(OH)<sub>36</sub>, (g) CNT(OH)<sub>72</sub>, (h) without CNT.

## 2. Setups of different MD simulations systems.

**Table S1** The detailed information for different MD simulation systems.

| Simulation systems                                       | Box size<br>(nm <sup>3</sup> ) | Number of<br>water<br>molecules | Total atom<br>number |
|----------------------------------------------------------|--------------------------------|---------------------------------|----------------------|
| CNT-A $\beta$ <sub>42</sub> peptide                      | 7.7x6.2x9.8                    | 15123                           | 47219                |
| CNT(COOH) <sub>12</sub> -A $\beta$ <sub>42</sub> peptide | 7.7x6.4x9.8                    | 15618                           | 48752                |
| CNT(COOH) <sub>36</sub> -A $\beta$ <sub>42</sub> peptide | 7.7x6.4x9.7                    | 15583                           | 48743                |
| CNT(COOH) <sub>72</sub> -A $\beta$ <sub>42</sub> peptide | 7.7x6.4x9.7                    | 15449                           | 48485                |
| CNT(OH) <sub>12</sub> - A $\beta$ <sub>42</sub> peptide  | 7.7x6.4x9.8                    | 15642                           | 48800                |

|                                                  |             |       |       |
|--------------------------------------------------|-------------|-------|-------|
| CNT(OH) <sub>36</sub> - Aβ <sub>42</sub> peptide | 7.7x6.4x9.8 | 15833 | 49421 |
| CNT(OH) <sub>72</sub> - Aβ <sub>42</sub> peptide | 7.7x6.4x9.8 | 15762 | 49280 |
| Aβ <sub>42</sub> peptide without CNT             | 7.7x5.2x5.2 | 6803  | 21039 |

### 3. Representative snapshots for other MD simulations systems.

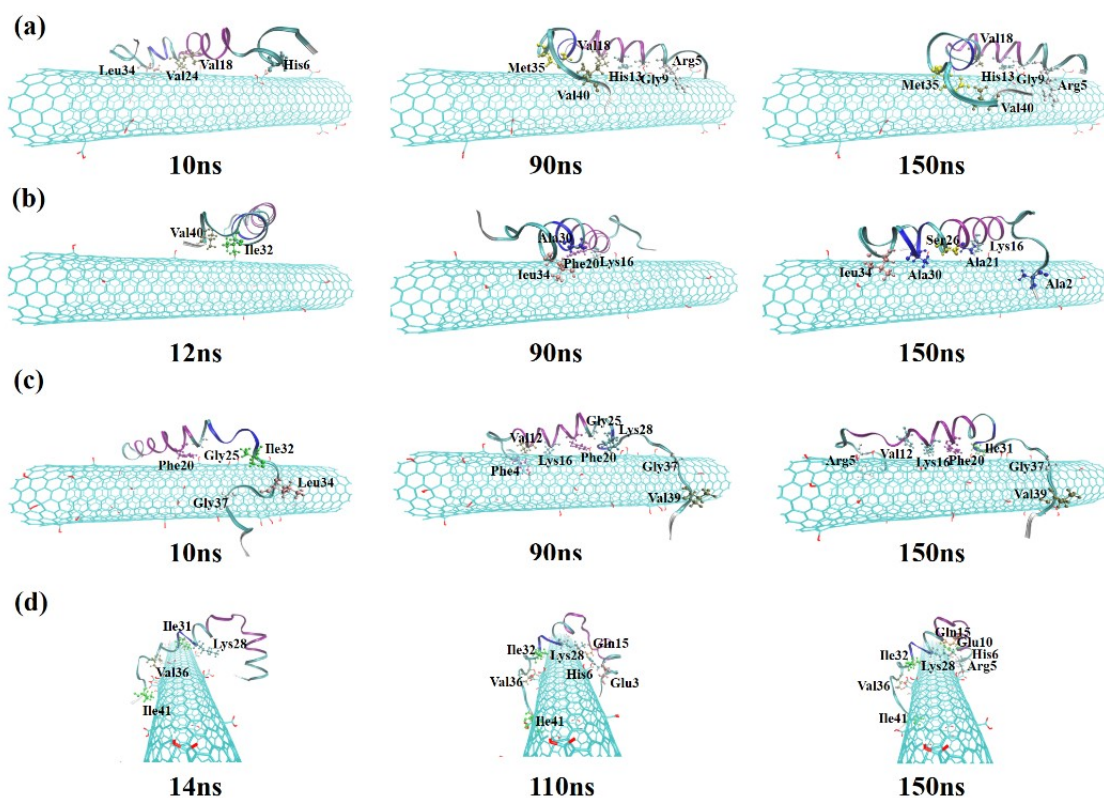

**Fig. S2** Representative snapshots during the binding process between Aβ<sub>42</sub> peptide and (a) CNT(COOH)<sub>12</sub>, (b) CNT(COOH)<sub>36</sub>, (c) CNT(OH)<sub>12</sub>, (d) CNT(OH)<sub>36</sub>.

### 4. Other independent simulations trajectory snapshots of the three systems: Aβ<sub>42</sub> peptide and CNT, CNT(COOH)<sub>72</sub>, CNT(OH)<sub>72</sub>.

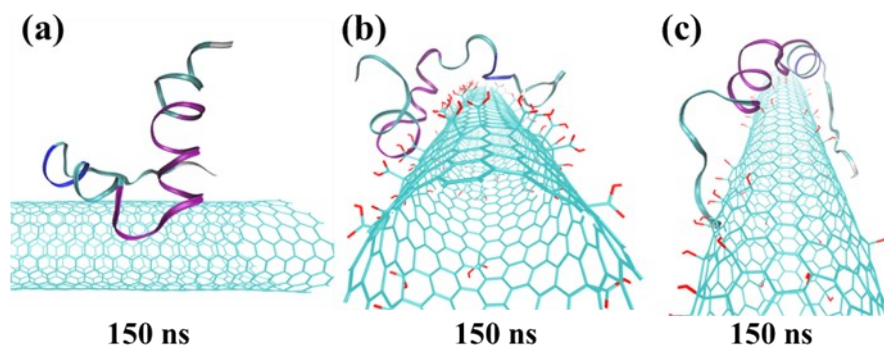

**Fig. S3** Snapshot trajectory of  $A\beta_{42}$  peptide - (a) CNT, (b)  $CNT(COOH)_{72}$ , (c)  $CNT(OH)_{72}$  at the end of simulation time.

### 5. The RMSD of other independent simulations for each system.

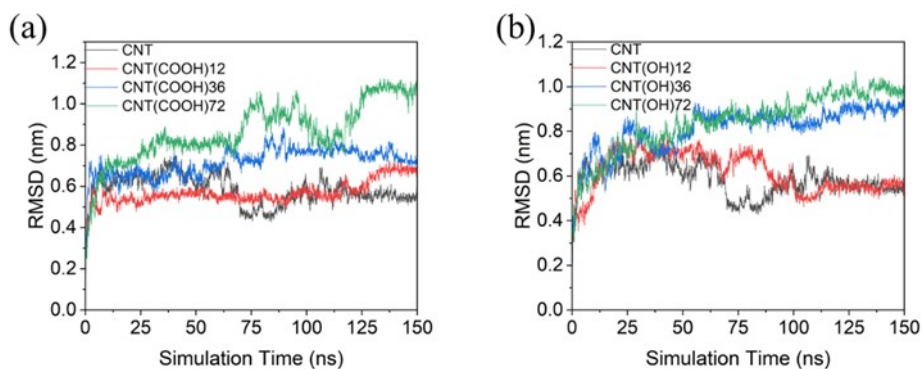

**Fig. S4** (a, b) The RMSD of other independent simulations for each system.

### 6. The time evolution of H-bonds (a, b) within $A\beta_{42}$ peptide, and (c, d) between $A\beta_{42}$ peptide and water molecules.

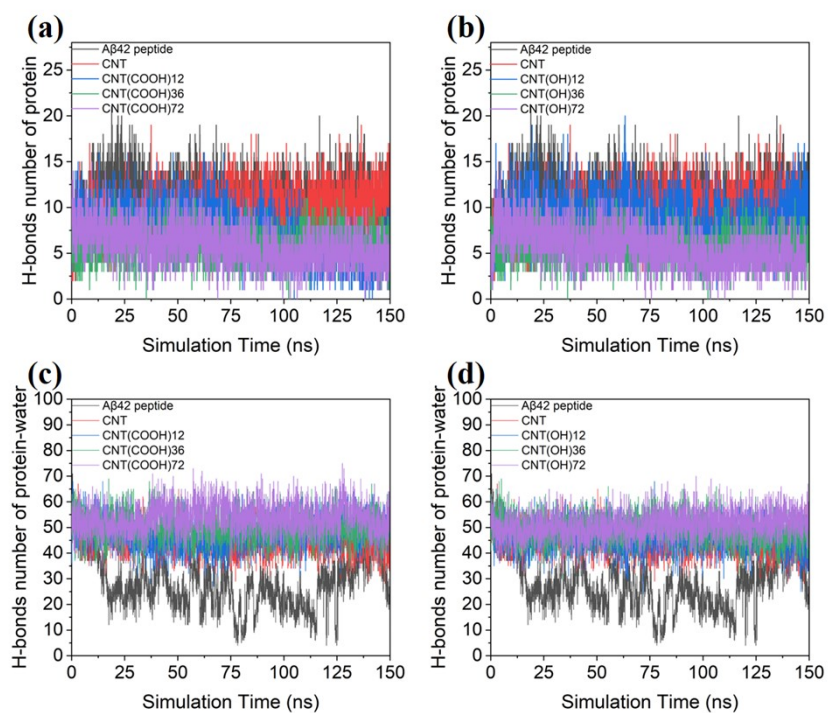

**Fig. S5** The time evolution of H-bonds (a, b) within  $A\beta_{42}$  peptide, and (c, d) between  $A\beta_{42}$  peptide and water molecules.

### 7. The H-bonds between the $A\beta_{42}$ peptide and $CNT(COOH)_{72}/CNT(OH)_{72}$ .

**Table S2** The kinds of H-bonds between the  $A\beta_{42}$  peptide and  $CNT(COOH)_{72}/CNT(OH)_{72}$ .

| $A\beta_{42}$ peptide - $CNT(COOH)_{72}$ |              | $A\beta_{42}$ peptide - $CNT(OH)_{72}$ |              |
|------------------------------------------|--------------|----------------------------------------|--------------|
| Donor                                    | Acceptor     | Donor                                  | Acceptor     |
| Ala42-Main                               | CNT1192-Main | Val40-Main                             | CNT1303-Main |
| Ile41-Main                               | CNT1260-Main | Ile41-Main                             | CNT1303-Main |
| Ala42-Main                               | CNT1260-Main | Leu34-Main                             | CNT1275-Main |
| His13-Side                               | CNT1424-Main | Met35-Main                             | CNT1275-Main |
| His6-Side                                | CNT1400-Main | Leu34-Main                             | CNT1269-Main |

|            |              |            |              |
|------------|--------------|------------|--------------|
| Arg5-Side  | CNT1404-Main | Ala30-Main | CNT1261-Main |
| Ser8-Side  | CNT1424-Main | Lys28-Side | CNT1251-Main |
| His13-Side | CNT1208-Main | His6-Side  | CNT1349-Main |
| His6-Side  | CNT1434-Main | His6-Side  | CNT1363-Main |
| HIS13-Side | CNT1204-Main | Ser8-Side  | CNT1355-Main |
| His13-Side | CNT1202-Main | Arg5-Side  | CNT1349-Main |
| His13-Side | CNT1200-Main | Asn27-Side | CNT1251-Main |
| Ser26-Side | CNT1238-Main | Arg5-Main  | CNT1225-Main |
| His13-Side | CNT1212-Main |            |              |
| His13-Side | CNT1206-Main |            |              |
| His6-Side  | CNT1402-Main |            |              |
| His6-Side  | CNT1378-Main |            |              |
| Val36-Main | CNT1260-Main |            |              |
| Gly37-Main | CNT1260-Main |            |              |
| Gly38-Main | CNT1194-Main |            |              |
| Glu3-Main  | CNT1464-Main |            |              |

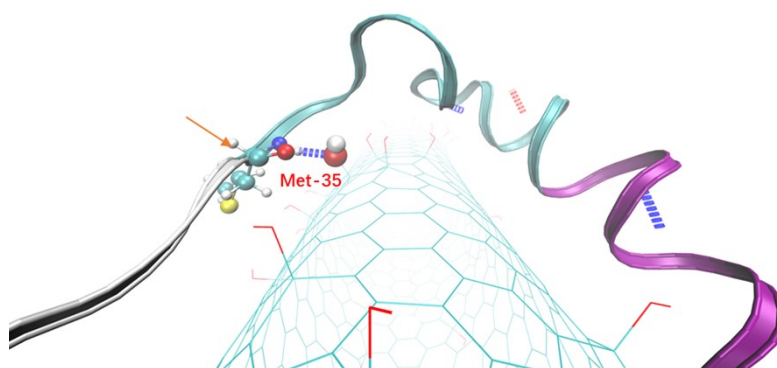

**Fig. S6** Met35 forms H-bonds with the surface of CNTs, which destroys the original secondary structure ( $\beta$ -turn) and forms random coils.

## 8. Interaction energy analyses (kcal/mol)

**Table S3** The binding energy ( $\Delta G_{\text{bind}}$ ) between A $\beta_{42}$  peptide and different CNTs

| CNTs                    | $\Delta G_{\text{complex}}$ | $\Delta G_{\text{protein}}$ | $\Delta G_{\text{CNT}}$ | $\Delta G_{\text{interaction}}$ |
|-------------------------|-----------------------------|-----------------------------|-------------------------|---------------------------------|
| CNT                     | +3778.14 $\pm$ 64.67        | -674.75 $\pm$ 61.32         | +4464.03 $\pm$ 28.61    | -109.39 $\pm$ 6.90              |
| CNT(COOH) <sub>12</sub> | +4441.05 $\pm$ 29.12        | -486.19 $\pm$ 55.74         | +3818.85 $\pm$ 63.14    | -136.01 $\pm$ 7.02              |
| CNT(COOH) <sub>36</sub> | +3719.62 $\pm$ 59.14        | -539.00 $\pm$ 56.73         | +4406.50 $\pm$ 30.35    | -147.88 $\pm$ 9.82              |
| CNT(COOH) <sub>72</sub> | +3738.43 $\pm$ 66.26        | -468.39 $\pm$ 56.45         | +4362.59 $\pm$ 31.68    | -155.77 $\pm$ 10.27             |
| CNT(OH) <sub>12</sub>   | +3682.10 $\pm$ 67.09        | -669.95 $\pm$ 59.65         | +4465.20 $\pm$ 28.89    | -113.15 $\pm$ 7.61              |
| CNT(OH) <sub>36</sub>   | +3778.71 $\pm$ 68.14        | -518.51 $\pm$ 44.10         | +4470.35 $\pm$ 28.73    | -173.45 $\pm$ 7.41              |
| CNT(OH) <sub>72</sub>   | +3854.30 $\pm$ 43.27        | -416.78 $\pm$ 28.75         | +4456.81 $\pm$ 30.71    | -185.56 $\pm$ 7.92              |

## 9. The interaction energy between amino acids and CNT, CNT(OH)<sub>72</sub>, CNT(COOH)<sub>72</sub>

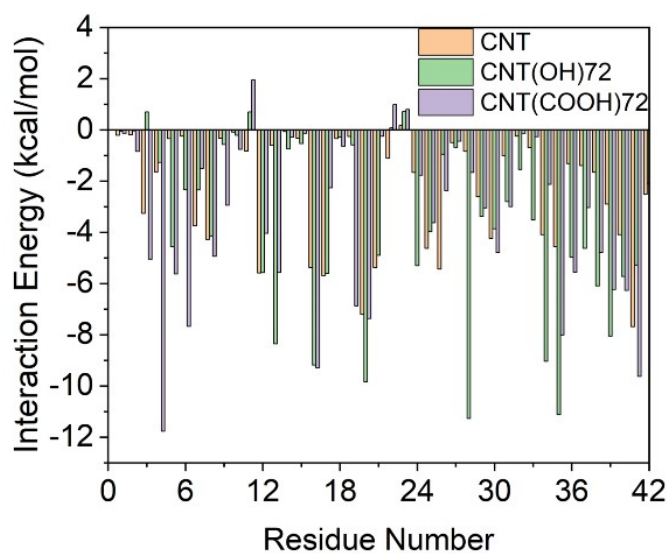

**Fig. S7** The interaction energy between amino acids of Aβ<sub>42</sub> peptide and CNT, CNT(OH)<sub>72</sub>, CNT(COOH)<sub>72</sub>.

### 10. Time evolution of the number of water molecules

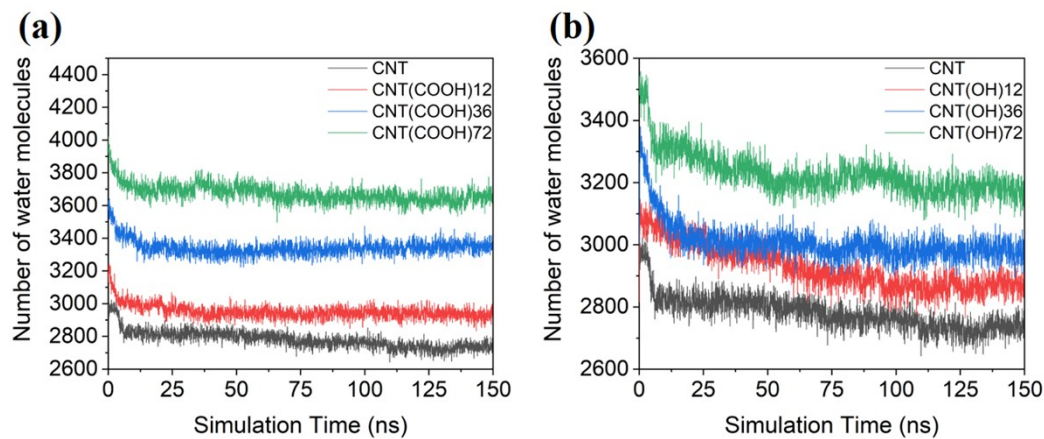

**Fig. S8** (a, b) Time evolution of the number of water molecules (within 6 Å of CNTs).

### 11. Relative conformation test



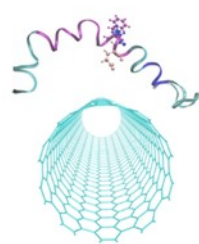

a. The conformation we adopt

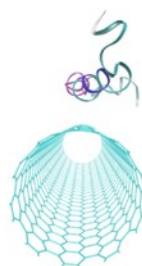

b. The conformation we test

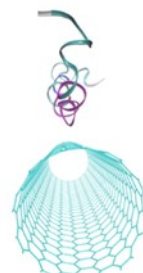

c. The conformation we test

**Fig. S9** Different conformations we test.
